# Supplementary material for: The Prevalence and Burden of Chronic Kidney Disease, Patterns of Anticoagulation Prescribing, and Major Bleeding Risk in Older Adults with Atrial Fibrillation
Source: Research Square preprint supplement (doi:10.21203/rs.3.rs-5676695/v1), 2025-04-10
Supplement: Supplementary file 1 [file 52f3578df7be0f5a90f54663.docx]

**Supplemental Material** – **Supplement 1**

**Table 1a.** Multivariable Adjusted Relationship between Chronic Kidney Disease and Major Bleeding Risk Among Older Adult on Warfarin

| **GFR Categories** | **Major Bleeding**  **Events (n)** | **Crude HR**  **(95% CI)** | ***Adjusted HR**  **(95% CI)** |
| --- | --- | --- | --- |
| Normal | 11 | Ref | Ref |
| Mild CKD | 26 | 1.04 (0.51 – 2.12) | 1.21 (0.57 -2.56) |
| Moderate CKD | 19 | 1.00 (0.47 -2.12) | 0.99 (0.44 – 2.22) |
| Severe CKD to ESRD | 4 | 2.23 (0.71-7.00) | 1.95 (0.58 – 6.60) |
| * Adjusted for sociodemographic variables (age, sex, race, marital status), psychosocial and geriatric variables (symptoms of depression, self-rated health, frailty, independent functioning), and clinical variables (atrial fibrillation duration, prior ablation, aspirin use, fish oil supplementation, oral iron intake, hypertension, dyslipidemia, heart failure, anemia, and HASBLED risk score) | | | |

**Table 1b.** Multivariable Adjusted Relationship between Chronic Kidney Disease and Major Bleeding Risk Among Older Adult on Directly Acting Oral Anticoagulation

| **GFR Categories** | **Major Bleeding**  **Events (n)** | **Crude HR**  **(95% CI)** | ***Adjusted HR**  **(95% CI)** |
| --- | --- | --- | --- |
| Normal | 5 | Ref | Ref |
| Mild CKD | 11 | 1.42 (0.49 – 4.08) | 1.72 (0.56 – 5.33) |
| Moderate CKD | 17 | 4.28 (1.58 -11.60) | 2.91 (0.98 – 8.60) |
| Severe CKD to ESRD | 2 | 10.21 (1.98 -52.74) | 5.97 (0.84 – 42.4) |
| * Adjusted for sociodemographic variables (age, sex, race, marital status), psychosocial and geriatric variables (symptoms of depression, self-rated health, frailty, independent functioning), and clinical variables (atrial fibrillation duration, prior ablation, aspirin use, fish oil supplementation, oral iron intake, hypertension, dyslipidemia, heart failure, anemia, and HASBLED risk score) | | | |
